# Supplementary material
Source: PubMed Central journal article supplement (PMC8325540)
Supplement: 10570_2021_4107_MOESM1_ESM.pdf [file 10570_2021_4107_MOESM1_ESM.pdf]

# Photodynamic Antifungal Activity of a Superparamagnetic and Fluorescent Drug Carrier System against Antibiotic-Resistant Fungal Strains

Sherin Philip<sup>1</sup>(ORCID-0000-0001-8304-0881) and Sunny Kuriakose<sup>1\*</sup>(ORCID-0000-0001-7874-9933)

<sup>1</sup>Research and Post-Graduate Department of Chemistry, St.Thomas College, Palai-686574

Mahatma Gandhi University, Kottayam, Kerala, India

\* skresearchgroup16@gmail.com, sherinphilip.m@gmail.com, 91-9447290973

## Supporting Information

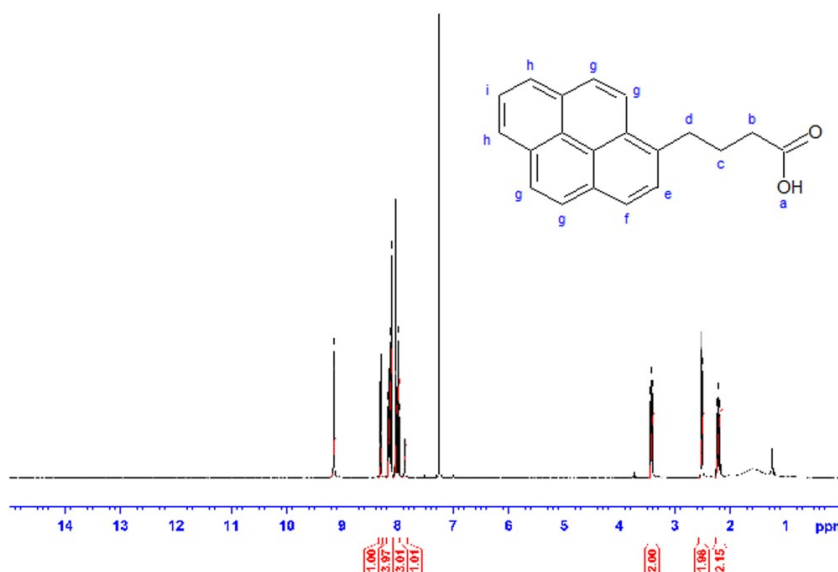

Fig.S1 <sup>1</sup>H NMR spectrum of PBA

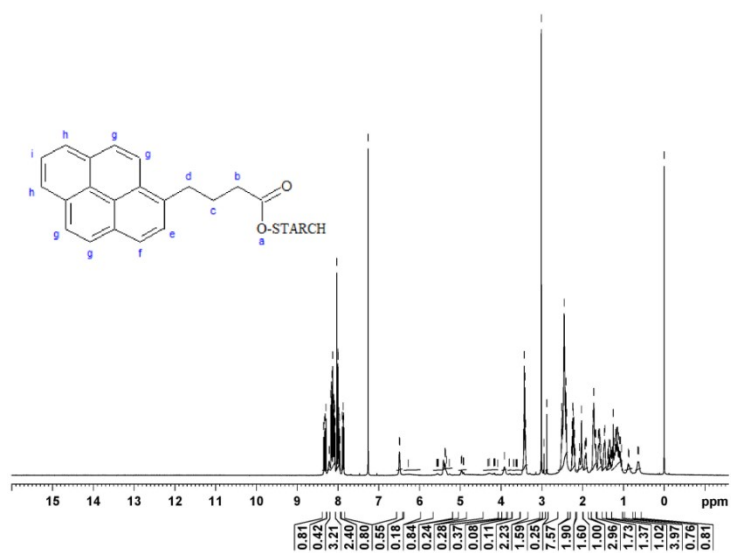

**Fig.S2** <sup>1</sup>H NMR spectrum of STARCH-PBA (FS)
